# Supplementary material for: Role of Portion Size in the Context of a Healthy, Balanced Diet: A Case Study of European Countries
Source: MDPI journal article supplement (doi:10.3390/ijerph20065230), 2023-03-22
Supplement: s1 [file s1]

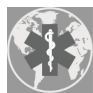

Supplementary Materials

## Role of Portion Size in the Context of a Healthy, Balanced Diet: A Case Study of European Countries

Michele O. Carruba <sup>1</sup>, Maurizio Ragni <sup>1</sup>, Chiara Ruocco <sup>1</sup>, Sofia Aliverti <sup>2</sup>, Marco Silano <sup>3</sup>, Andrea Amico <sup>4</sup>, Concetta M. Vaccaro <sup>4</sup>, Franca Marangoni <sup>2</sup>, Alessandra Valerio <sup>5</sup>, Andrea Poli <sup>2</sup> and Enzo Nisoli <sup>1,\*</sup>

<sup>1</sup> Center for Study and Research on Obesity, Department of Biomedical Technology and Translational Medicine, University of Milan, Via Vanvitelli, 32, 20129 Milan, Italy

<sup>2</sup> Nutrition Foundation of Italy, Viale Tunisia, 38, 20124 Milan, Italy

<sup>3</sup> Department of Food Safety, Nutrition and Veterinary Public Health, Istituto Superiore di Sanità, Viale Regina Elena, 299, 00161 Rome, Italy

<sup>4</sup> Health and Welfare Unit, Censis Foundation, Piazza di Novella, 2, 00199 Rome, Italy

<sup>5</sup> Department of Molecular and Translational Medicine, Brescia University, Viale Europa, 11, 25123 Brescia, Italy

\* Correspondence: enzo.nisoli@unimi.it; Tel.: +39-02-50317116

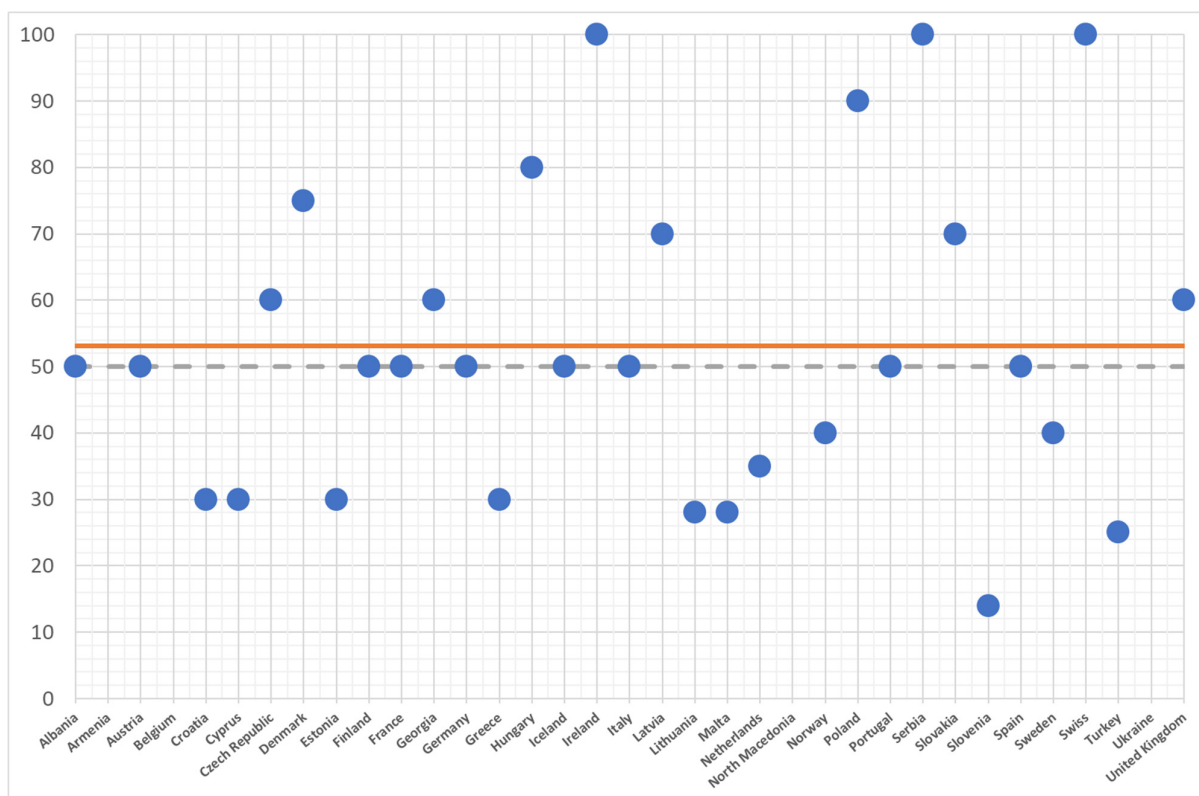

**Supplementary Figure S1.** Portion sizes of bread (g) in the different countries. Dashed gray line: reference standard portion defined by the Italian Society of Human Nutrition (SINU, 2014); full orange line: mean.

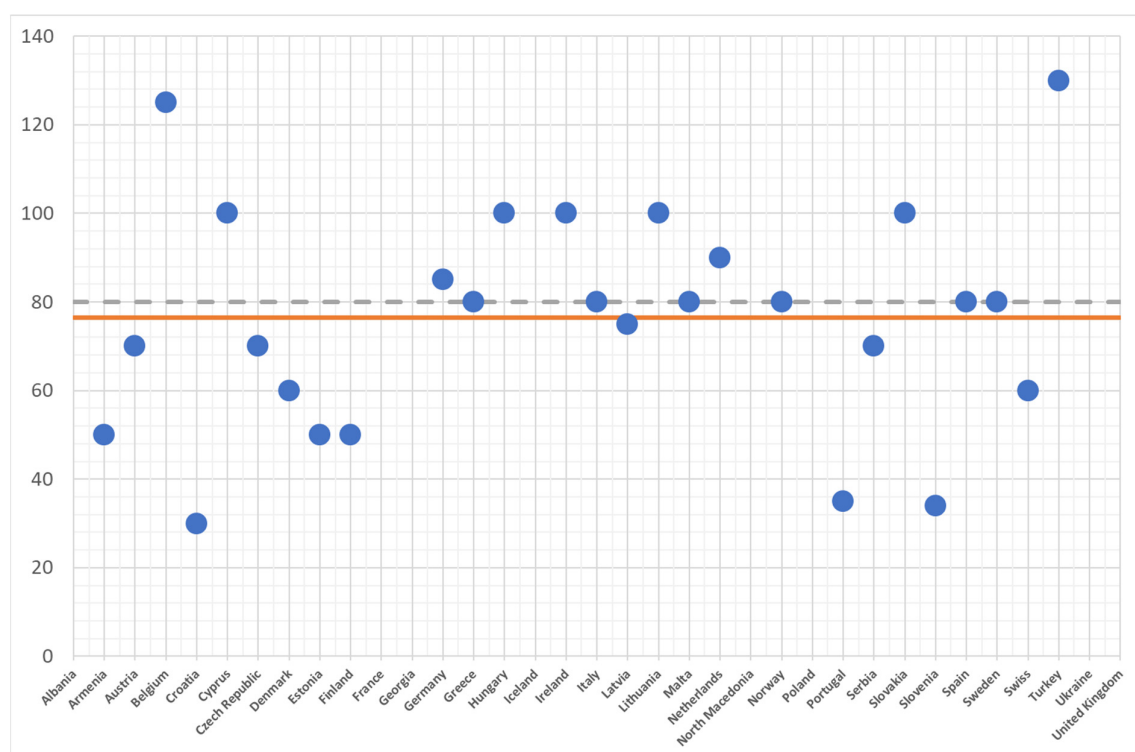

**Supplementary Figure S2.** Portion size of pasta & rice (raw) (g) in the different countries. Dashed gray line: reference standard portion defined by the Italian Society of Human Nutrition (SINU, 2014); full orange line: mean.

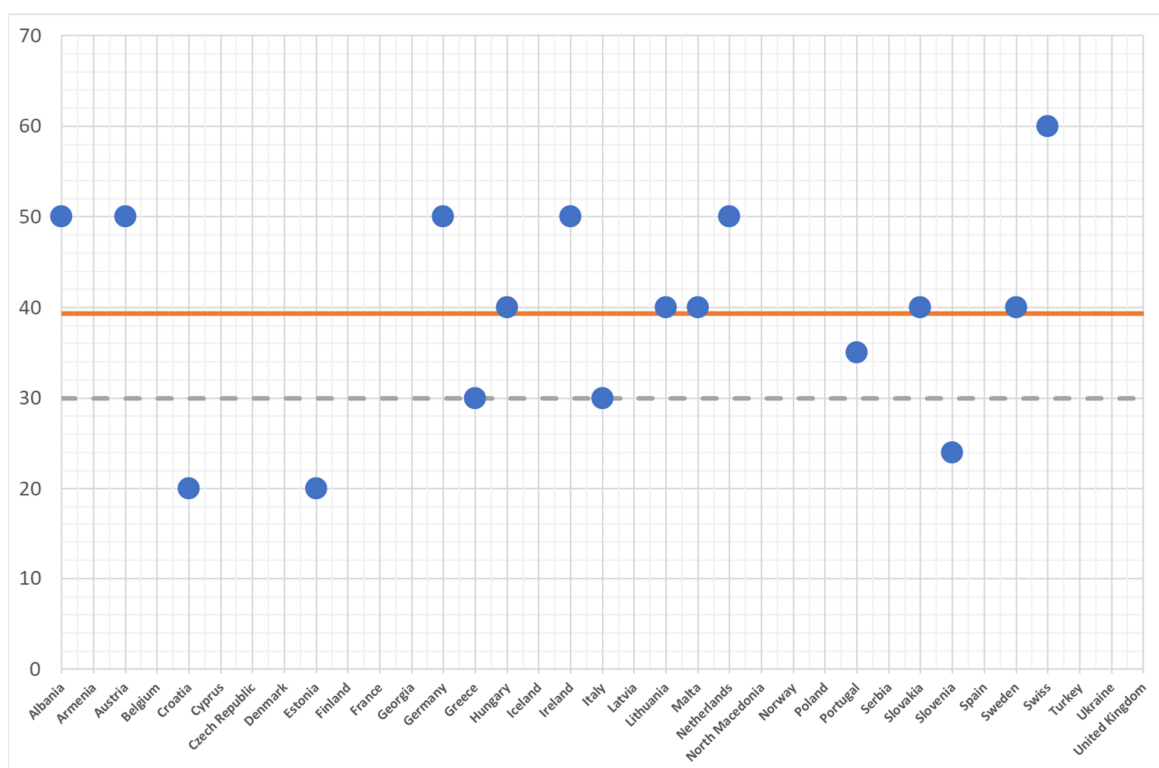

**Supplementary Figure S3.** Portion sizes of breakfast cereals (g) in the different countries. Dashed gray line: reference standard portion defined by the Italian Society of Human Nutrition (SINU, 2014); full orange line: mean.

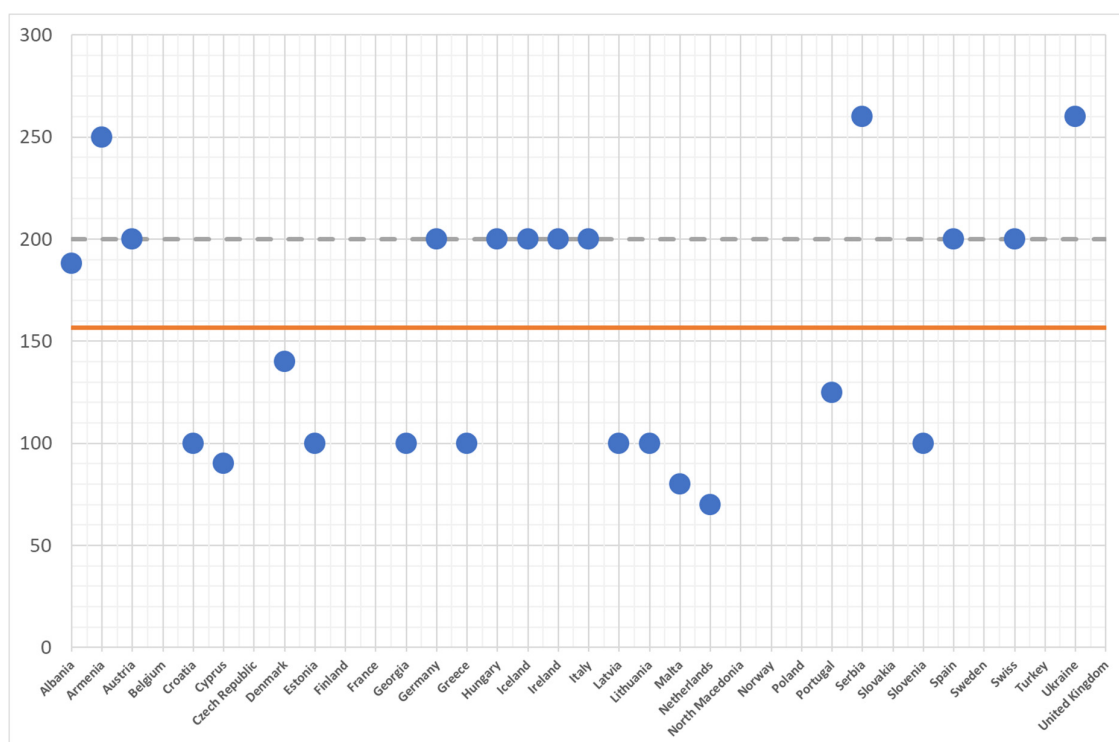

**Supplementary Figure S4.** Portion sizes of potatoes (g) in the different countries. Dashed gray line: reference standard portion defined by the Italian Society of Human Nutrition (SINU, 2014); full orange line: mean.

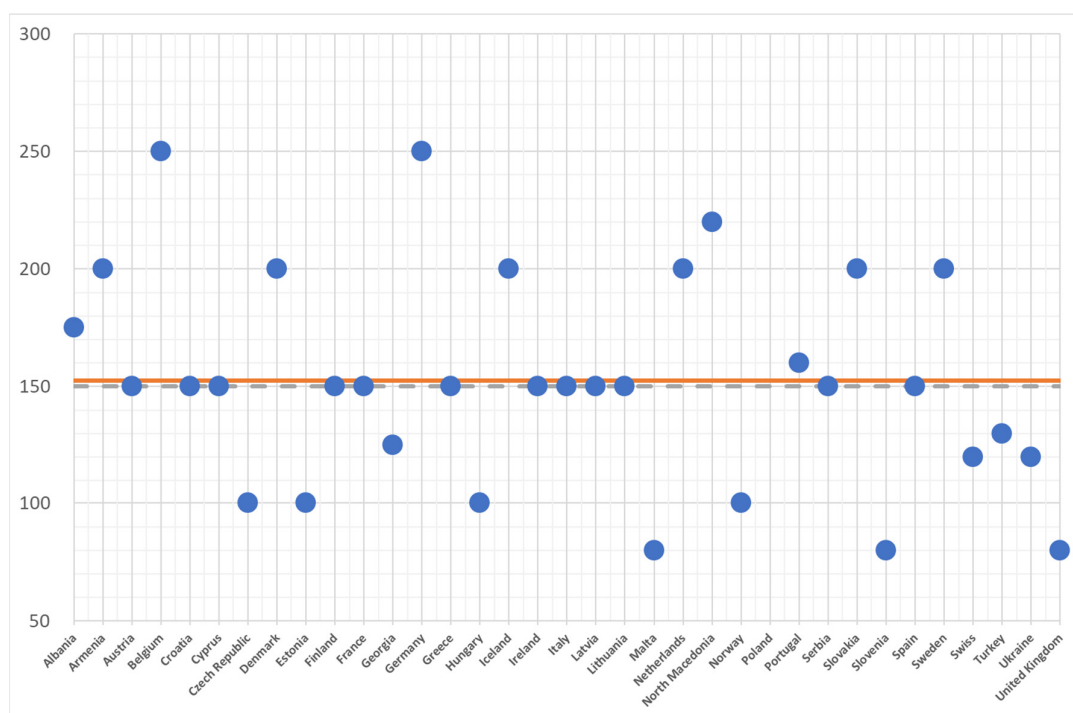

**Supplementary Figure S5.** Portion sizes of fresh fruit (g) in the different countries. Dashed gray line: reference standard portion defined by the Italian Society of Human Nutrition (SINU, 2014); full orange line: mean.

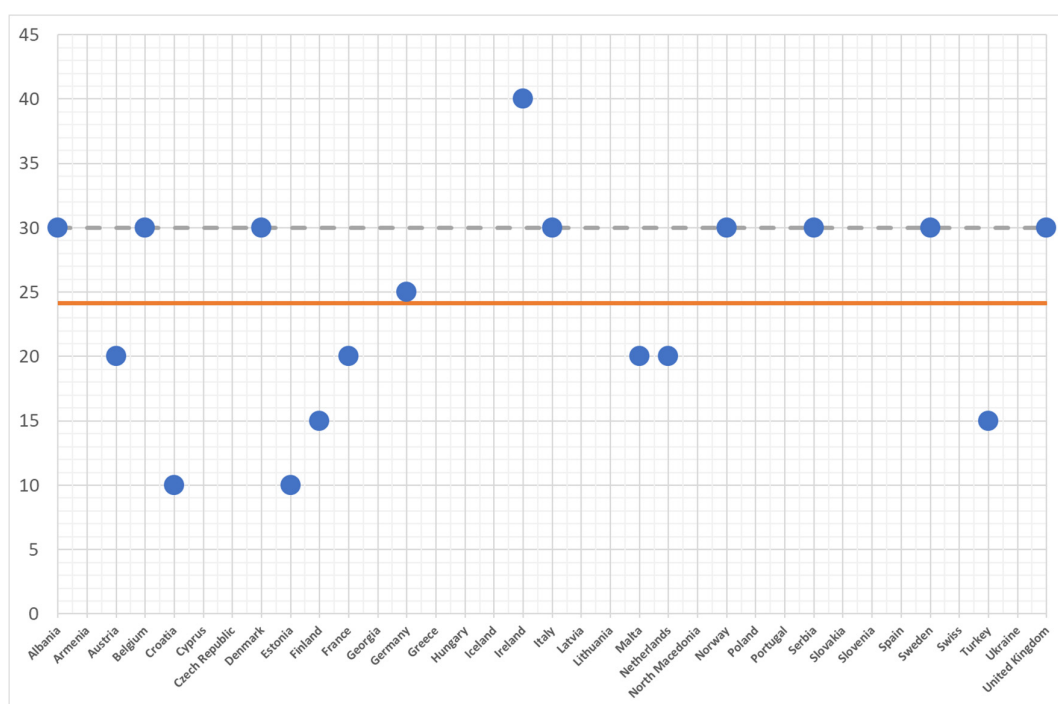

**Supplementary Figure S6.** Portion sizes of nuts (g) in the different countries. Dashed gray line: reference standard portion defined by the Italian Society of Human Nutrition (SINU, 2014); full orange line: mean.

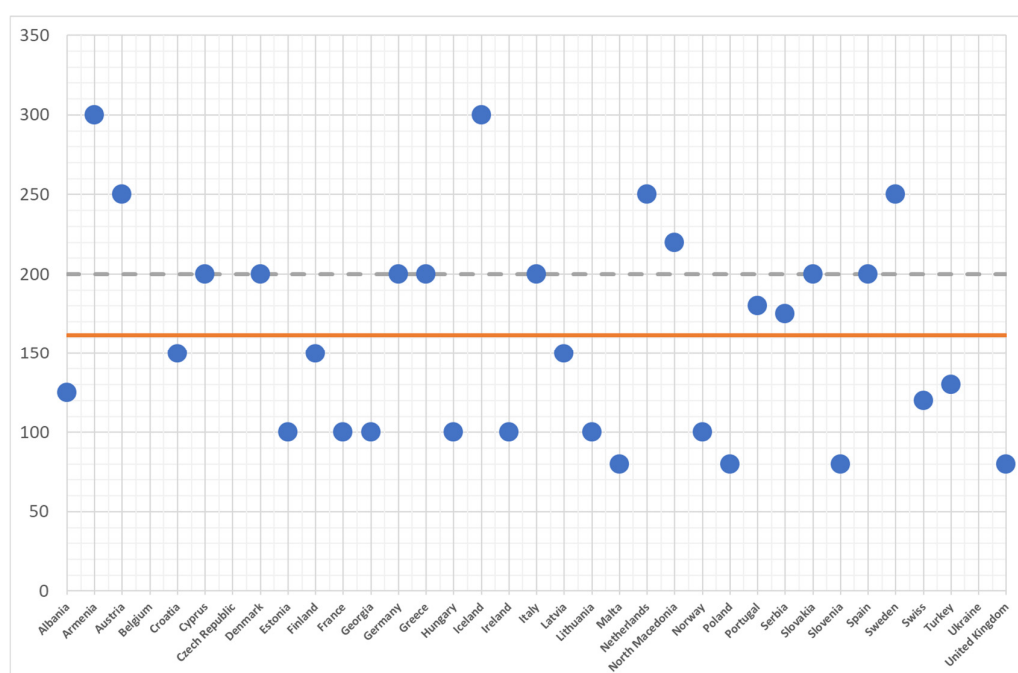

**Supplementary Figure S7.** Portion sizes of fresh vegetables (g) in the different countries. Dashed gray line: reference standard portion defined by the Italian Society of Human Nutrition (SINU, 2014); full orange line: mean.

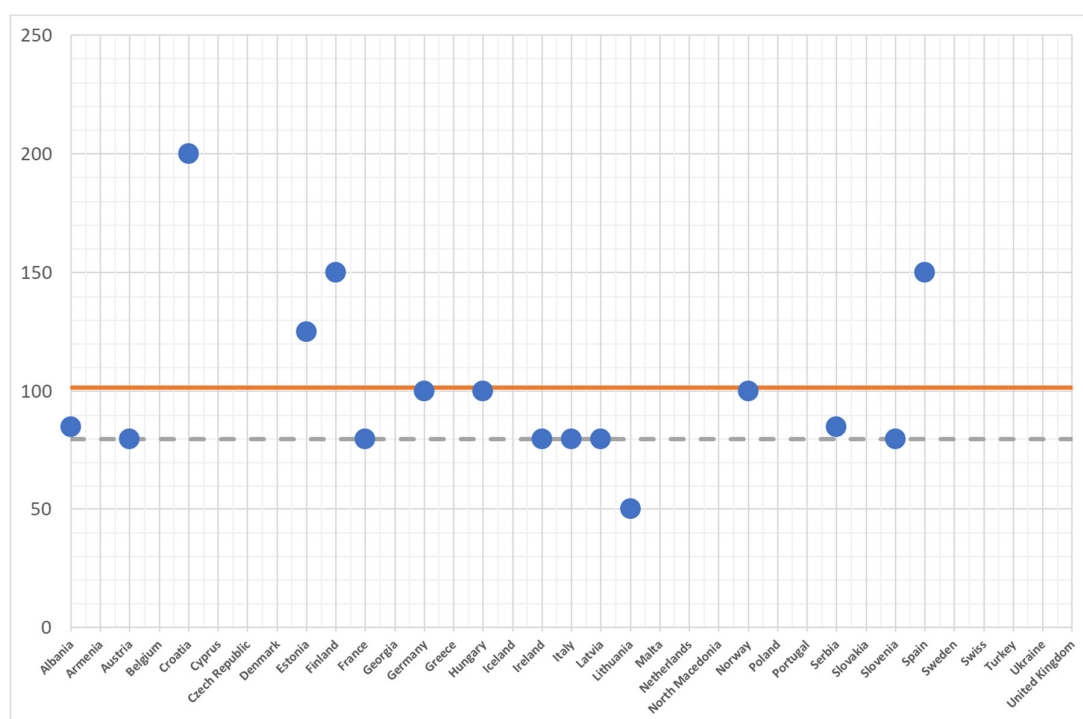

**Supplementary Figure S8.** Portion sizes of salad (g) in the different countries. Dashed gray line: reference standard portion defined by the Italian Society of Human Nutrition (SINU, 2014); full orange line: mean.

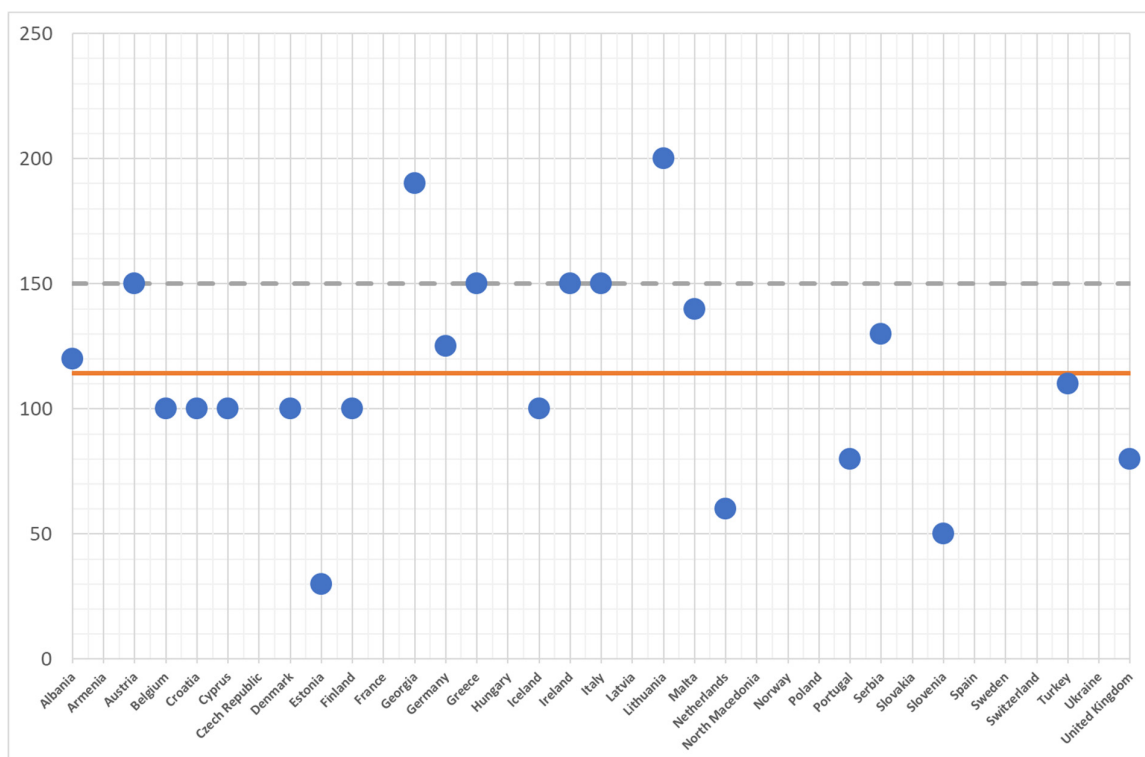

**Supplementary Figure S9.** Portion sizes of legumes (g) in the different countries. Dashed gray line: reference standard portion defined by the Italian Society of Human Nutrition (SINU, 2014); full orange line: mean.

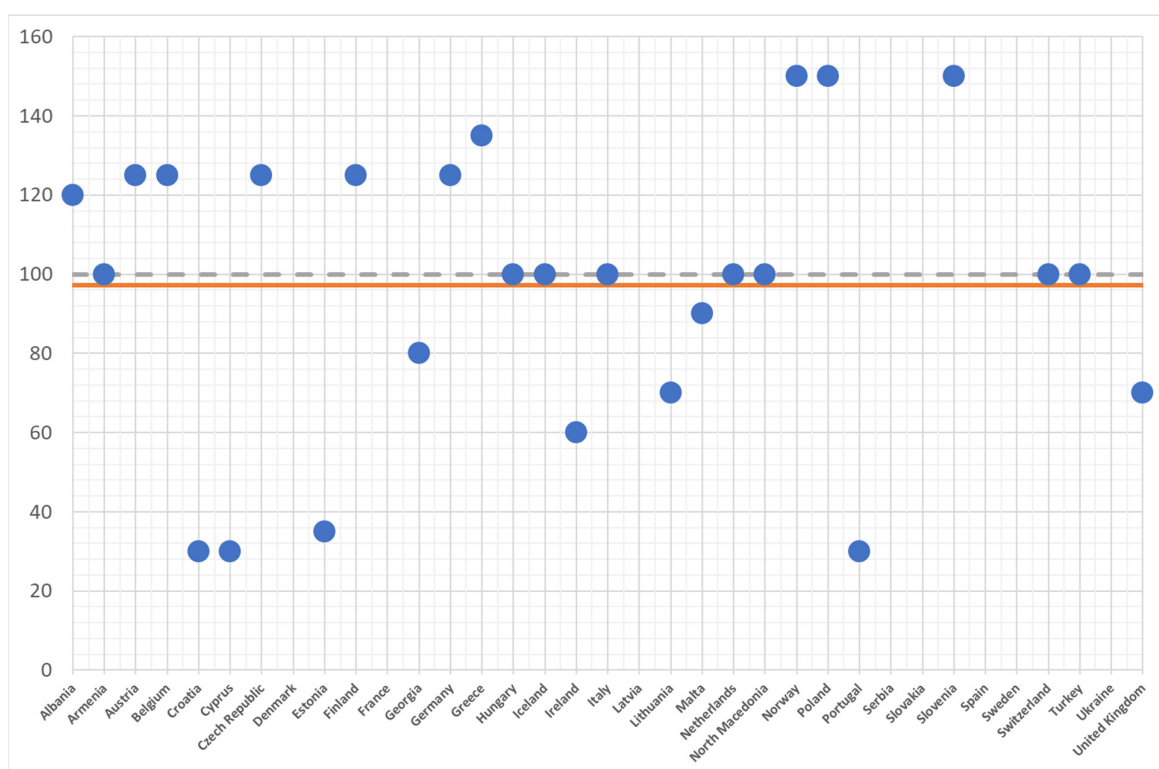

**Supplementary Figure S10.** Portion sizes of red meat (g) in the different countries. Dashed gray line: reference standard portion defined by the Italian Society of Human Nutrition (SINU, 2014); full orange line: mean.

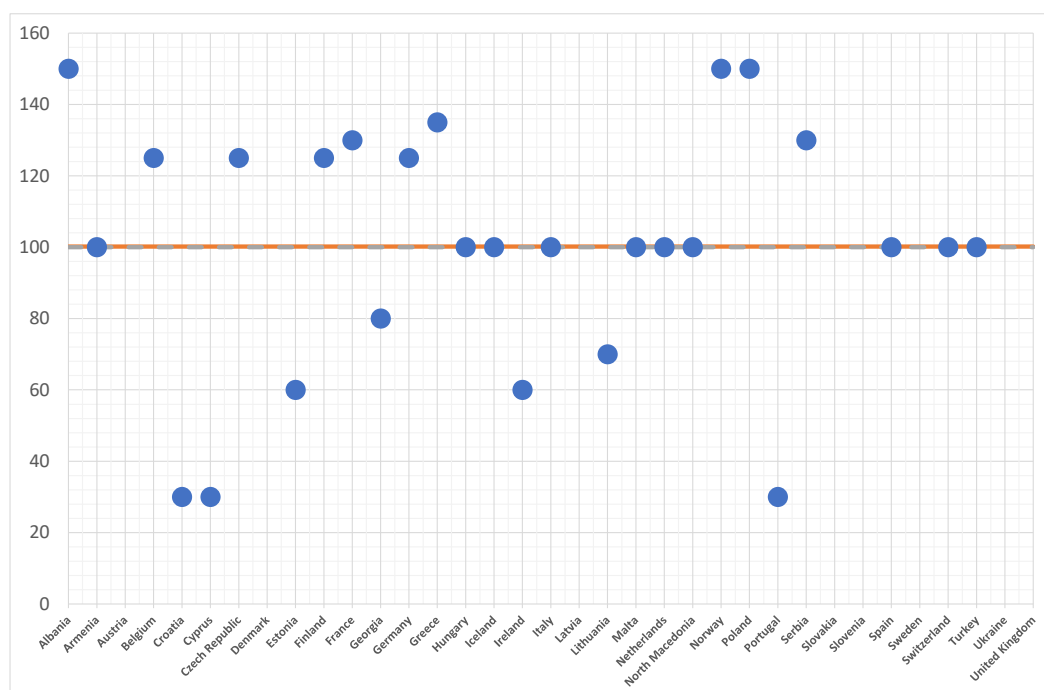

**Supplementary Figure S11.** Portion sizes of white meat (g) in the different countries. Dashed gray line: reference standard portion defined by the Italian Society of Human Nutrition (SINU, 2014); full orange line: mean.

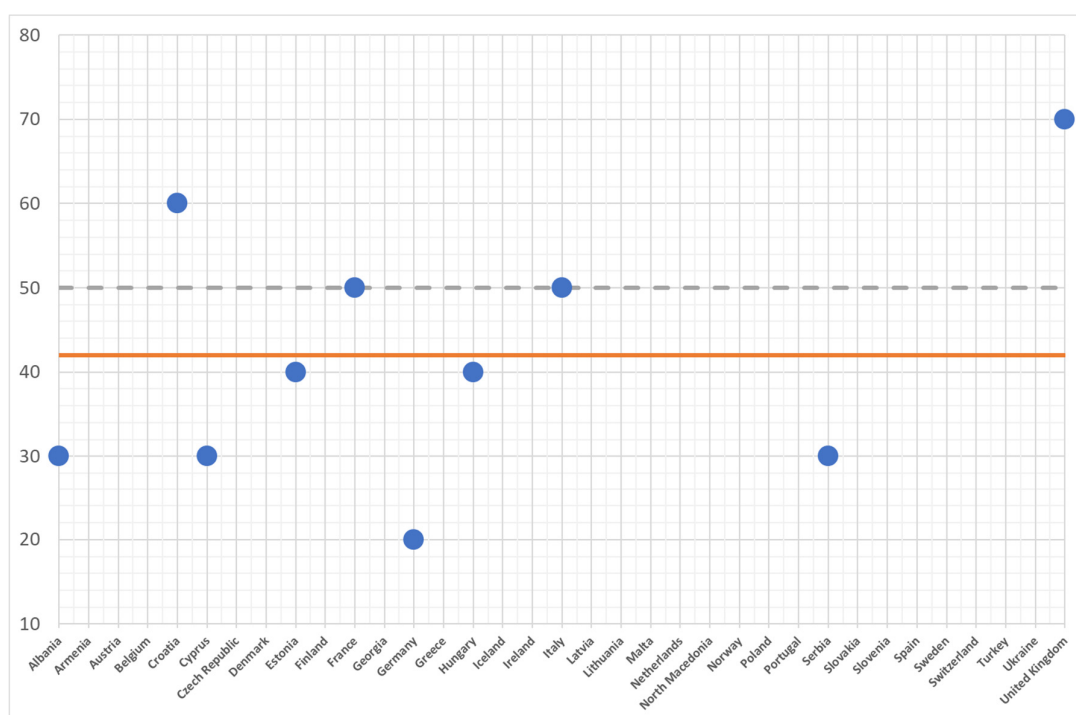

**Supplementary Figure S12.** Portion sizes of cured meat (g) in the different countries. Dashed gray line: reference standard portion defined by the Italian Society of Human Nutrition (SINU, 2014); full orange line: mean.

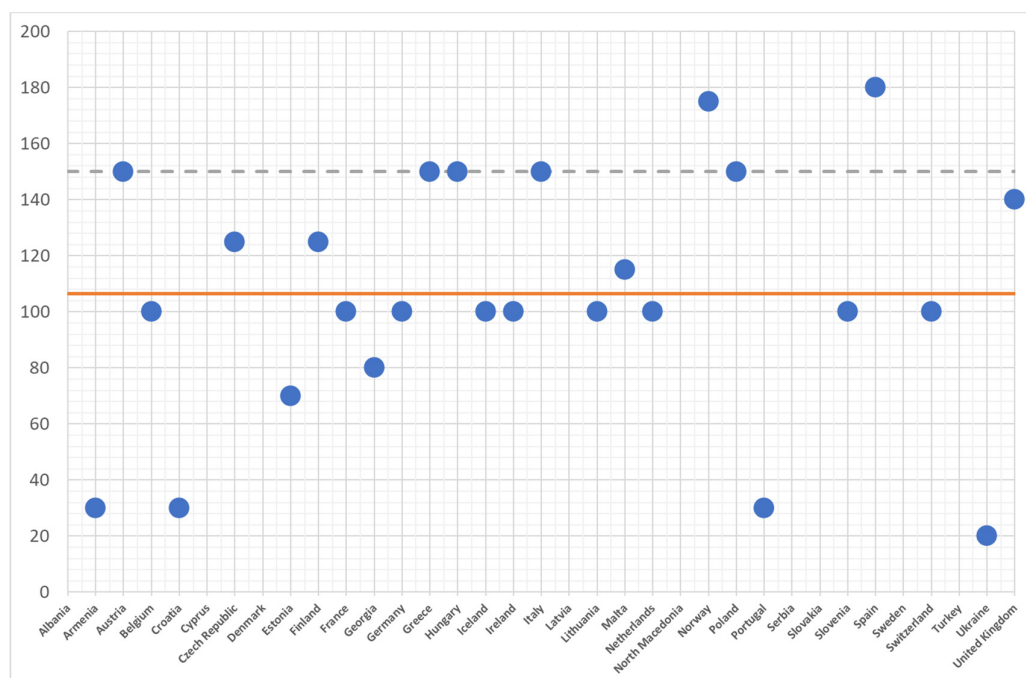

**Supplementary Figure S13.** Portions sizes of fish (g) in the different countries. Dashed gray line: reference standard portion defined by the Italian Society of Human Nutrition (SINU, 2014); full orange line: mean.

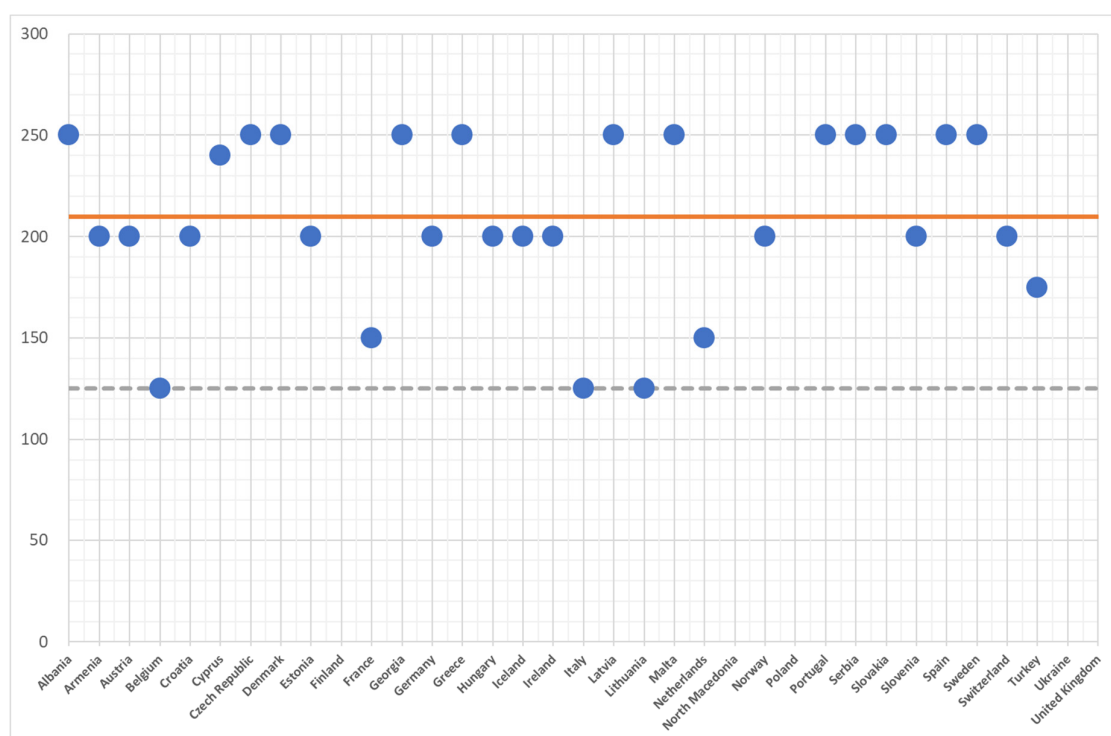

**Supplementary Figure S14.** Portion sizes of milk (ml) in the different countries. Dashed gray line: reference standard portion defined by the Italian Society of Human Nutrition (SINU, 2014); full orange line: mean.

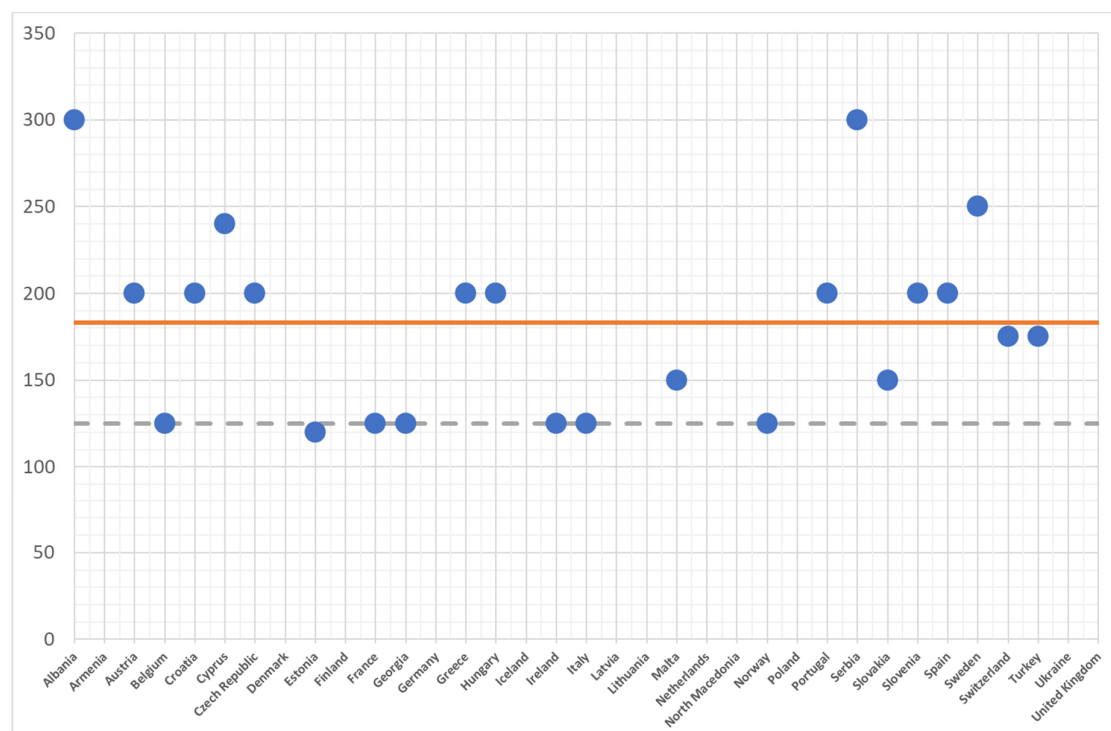

**Supplementary Figure S15.** Portion sizes of yogurt (g) in the different countries. Dashed gray line: reference standard portion defined by the Italian Society of Human Nutrition (SINU, 2014); full orange line: mean.

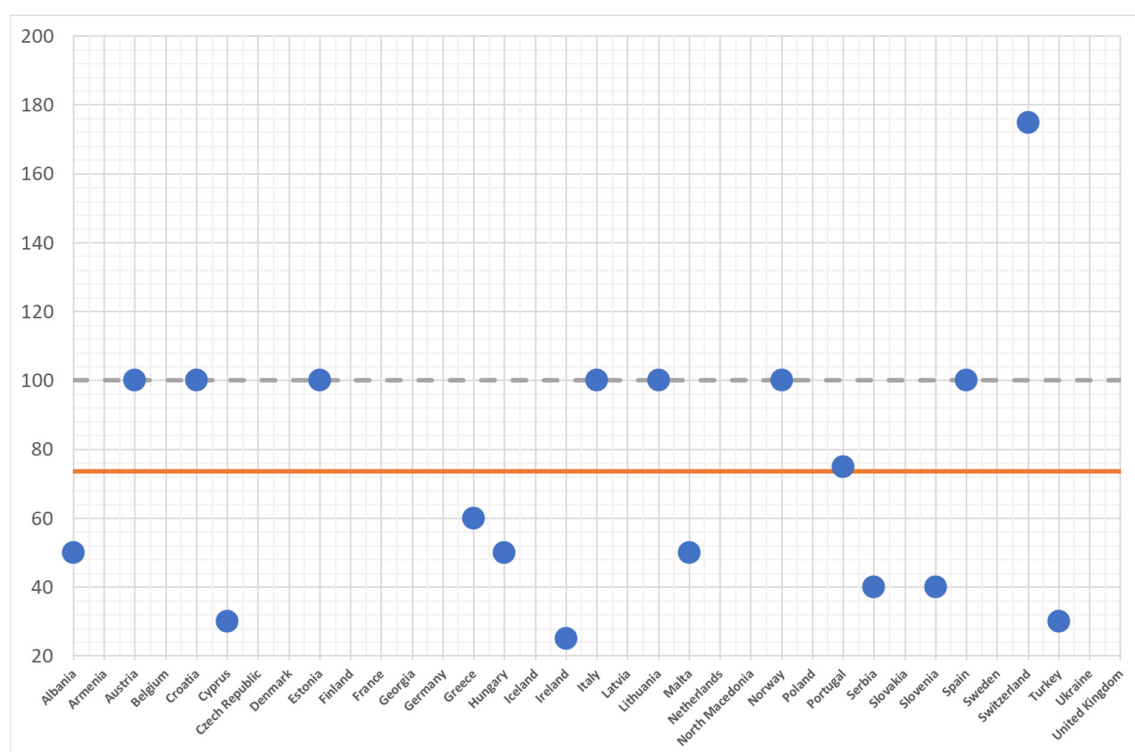

**Supplementary Figure S16.** Portion sizes of cream cheese (g) in the different countries. Dashed gray line: reference standard portion defined by the Italian Society of Human Nutrition (SINU, 2014); full orange line: mean.

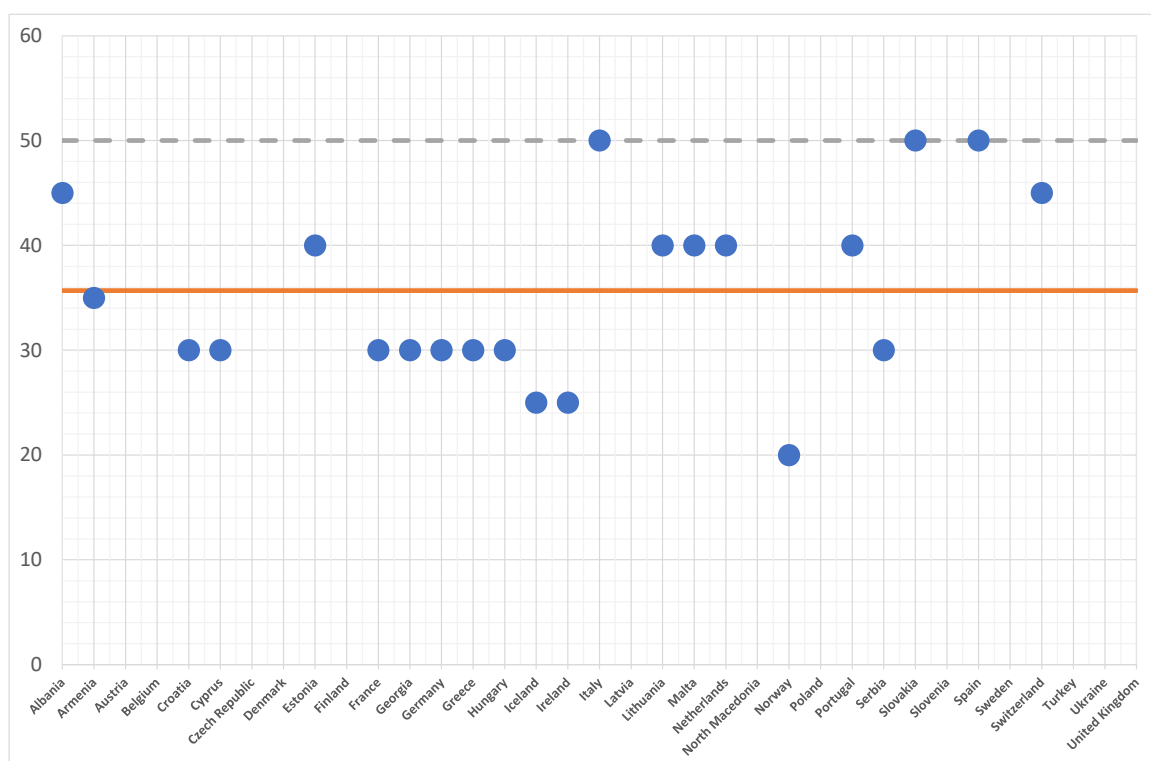

**Supplementary Figure S17.** Portion sizes of hard (ripened) cheese in the different countries. Dashed gray line: reference standard portion defined by the Italian Society of Human Nutrition (SINU, 2014); full orange line: mean.

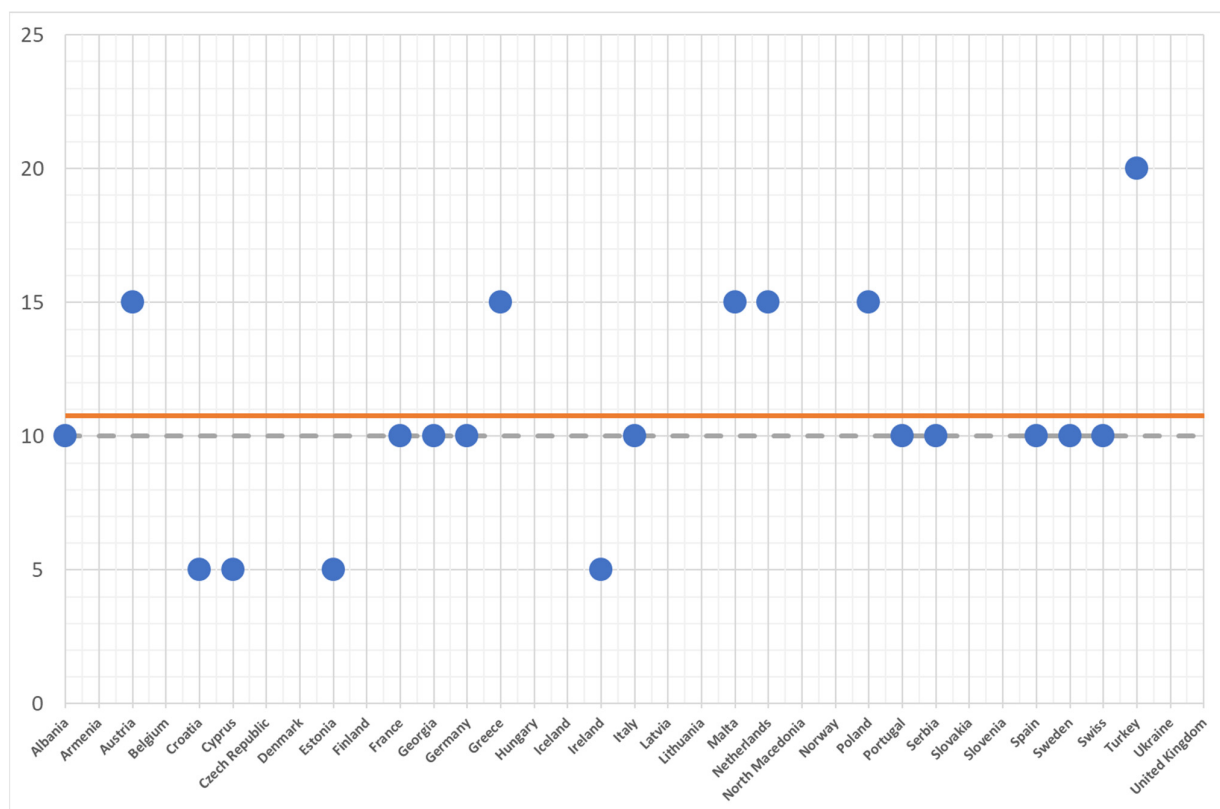

**Supplementary Figure S18.** Portion sizes of vegetable oils (g) in the different countries. Dashed gray line: reference standard portion defined by the Italian Society of Human Nutrition (SINU, 2014); full orange line: mean.
